# Supplementary material for: The PEA Bead Test as a Screening Tool for Olfactory Dysfunction: A Preliminary Study
Source: MDPI journal article supplement (doi:10.3390/life13102074), 2023-10-17
Supplement: s1 [file s1]

## *Supplementary Material*

# The PEA Bead Test as a Screening Tool for Olfactory Dysfunction: A Preliminary Study

Kyung Soo Kim <sup>1</sup>, Il-Youp Kwak <sup>2</sup> and Hyun Jin Min <sup>1,\*</sup>

<sup>1</sup> Department of Otorhinolaryngology-Head and Neck Surgery, College of Medicine, Chung-Ang University, Seoul 06973, Republic of Korea; entkks@cau.ac.kr

<sup>2</sup> Department of Applied Statistics, Chung-Ang University, 224-1 Heukseok-dong, Dongjak-gu, Seoul 06973, Republic of Korea; ikwak2@cau.ac.kr

\* Correspondence: jjinient@cau.ac.kr; Tel.: +82-2-6299-1765

**Figure S1**

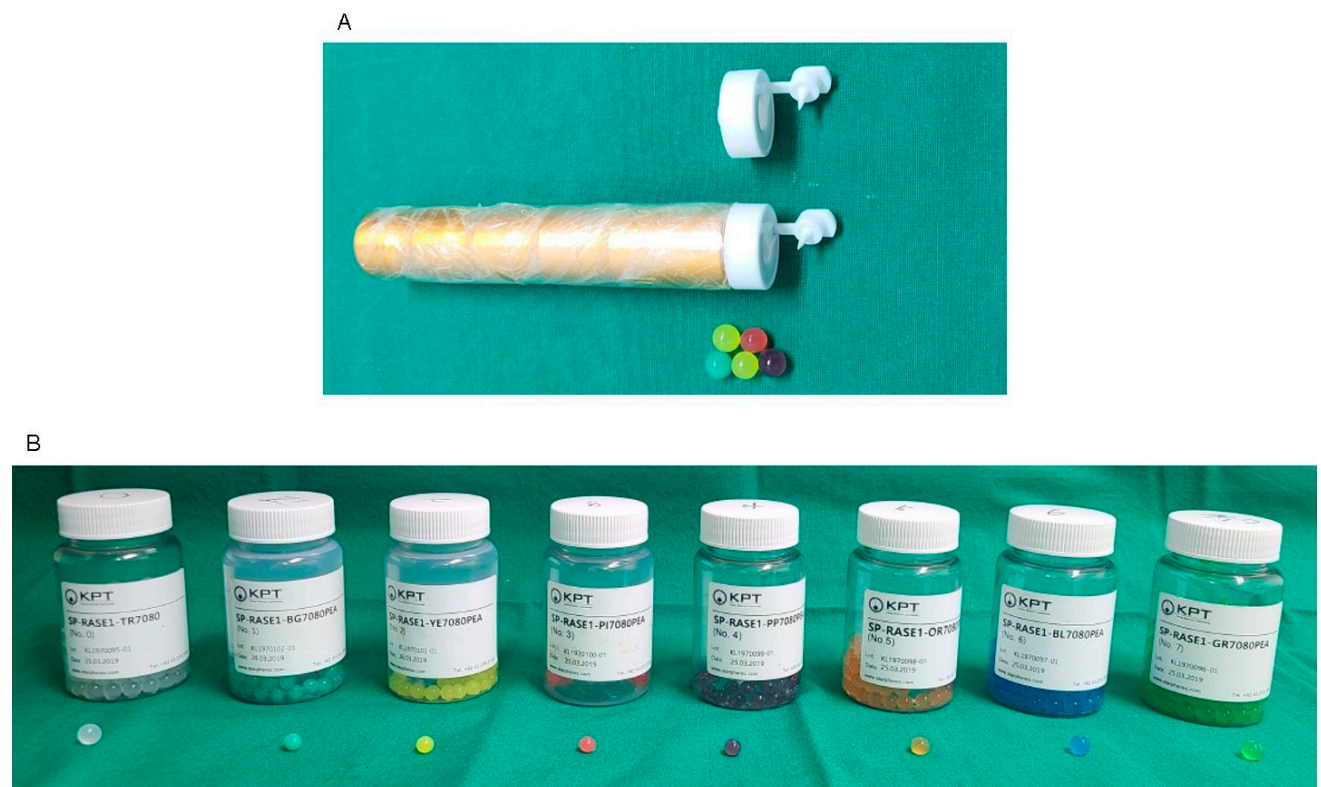

**Figure S1.** Image of the PEA sniffing bead test. (A) The sniffing bead system is composed of odorant beads, a handpiece, and a lid. (B) Beads packed with various concentrations of 2-phenylethyl alcohol (PEA) and beads packed with distilled water were used.
